# Supplementary material for: Novel full‐spectral flow cytometry with multiple spectrally‐adjacent fluorescent proteins and fluorochromes and visualization of in vivo cellular movement
Source: PubMed Central journal article supplement (PMC5132038; doi:10.1002/cyto.a.22725), 2015-07-28
Supplement: CYTO-87-830-s001.pdf [file CYTO-87-830-s001.pdf]

**Supplementary Table 1. The specifications of the spectral-FCM**

|              |                  |                                                                                       |                                                                                                     |                                      |
|--------------|------------------|---------------------------------------------------------------------------------------|-----------------------------------------------------------------------------------------------------|--------------------------------------|
| Optics       | Excitation       | Wavelength                                                                            | 488 nm LD / 638 nm LD                                                                               |                                      |
|              |                  | Power                                                                                 | 40 mW (488 nm), 60 mW (638 nm)                                                                      |                                      |
|              |                  | Beam spot                                                                             | Separation                                                                                          |                                      |
|              |                  | Beam spot shape                                                                       | Orthogonal flow direction: 40 $\mu\text{m}$ (Top Hat)<br>Flow direction: 6 $\mu\text{m}$ (Gaussian) |                                      |
|              | Detection        | Scattering                                                                            | FSC: a-Si PD (0.5~40 $\mu\text{m}$ particle size)                                                   |                                      |
|              |                  |                                                                                       | SSC: a-Si PD                                                                                        |                                      |
| Fluorescence |                  | Flow position of cell : quadrant a-Si PD<br>Independent voltage controllable 32ch PMT |                                                                                                     |                                      |
|              | Wavelength range | 500 – 800 nm                                                                          |                                                                                                     |                                      |
| Fluidics     | Velocity         |                                                                                       | Low (3 m/s), Mid (5 m/s), High (10 m/s)                                                             |                                      |
|              | Sample flow rate |                                                                                       | 18 $\mu\text{l}/\text{min}$ , 30 $\mu\text{l}/\text{min}$ , 60 $\mu\text{l}/\text{min}$             |                                      |
|              | Event rate       |                                                                                       | 10,000 event per second                                                                             |                                      |
|              | Flow cell chip   | Size                                                                                  |                                                                                                     | 25 mm*75 mm*2 mm                     |
|              |                  | Cross section of detection area                                                       |                                                                                                     | 200 $\mu\text{m}$ *200 $\mu\text{m}$ |
|              |                  | Sample core diameter                                                                  |                                                                                                     | 10 $\mu\text{m}\phi$ (nominal)       |
|              | Function         |                                                                                       | Exchangeable , automated chip alignment                                                             |                                      |
| Electronics  | Data resolution  |                                                                                       | Height 20 bit, Area 32 bit<br>Sampling frequency: 50 MHz                                            |                                      |

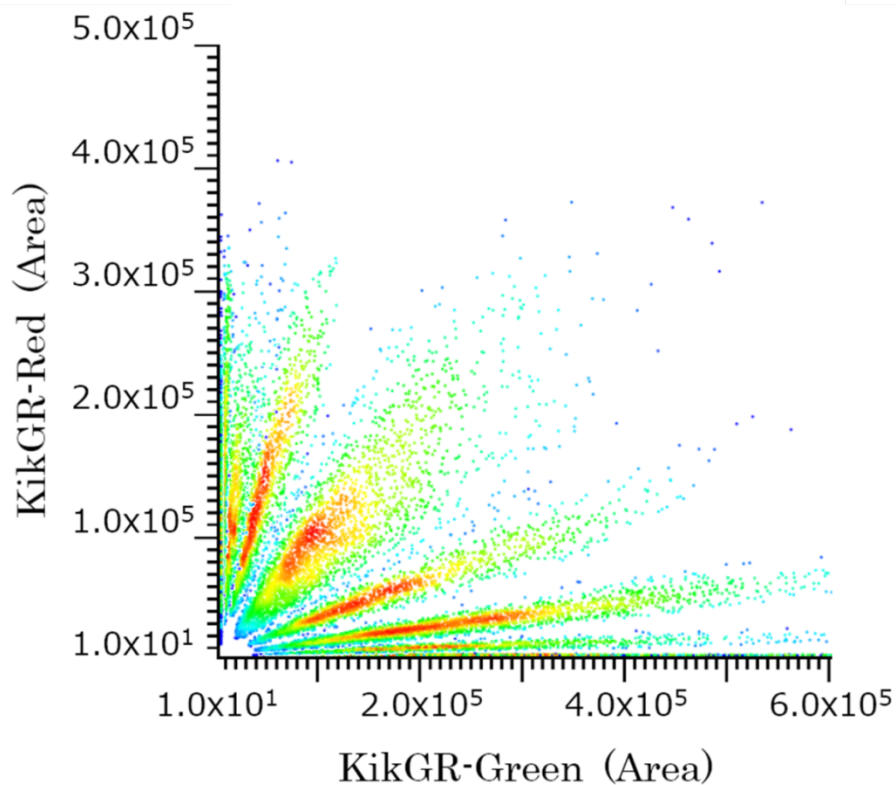

**Supplementary Figure 1. Rotational changes of dot plots during photoconversion in linear-linear axis of KikGR-Green and KikGF-Red.** Dot-plots data of **Fig. 3a** are merged and shown in linear-linear axis. Because the photoconversion of KikGR occurs as a one-to-one molecular reaction of chromophore change dot plots during photoconversion move around centered at the origin<sup>9, 10</sup>.

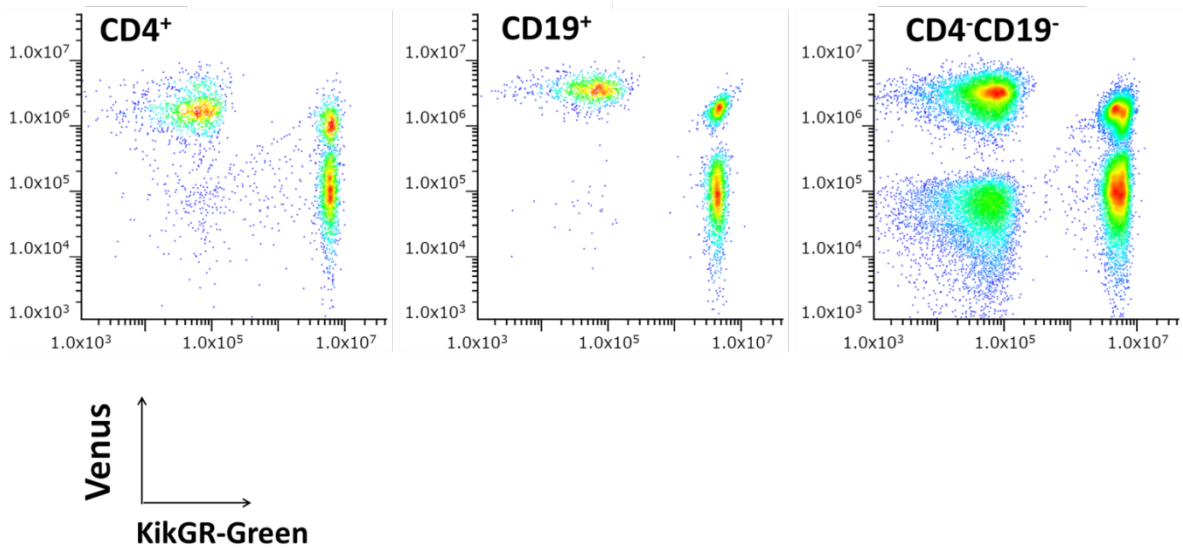

**Supplementary Figure 2. Difference among population of separation for KikGR-Green/Venus.** Splenocytes from KikGR mice, SCAT3.1 mice and KikGR/SCAT3.1 mice were stained with APC-conjugated anti-CD4 mAb and APC-Cy7-conjugated anti-CD19 mAb and analyzed by the spectral-FCM. These cells were divided into 3 populations, CD4<sup>+</sup>, CD19<sup>+</sup>, and CD4<sup>-</sup>CD19<sup>-</sup> and intensities of KikGR-green and Venus are shown in dot-plot. In each population, KikGR-Green and Venus have different fluorescent intensities and variances. Data are representative of two individual experiments.

**a**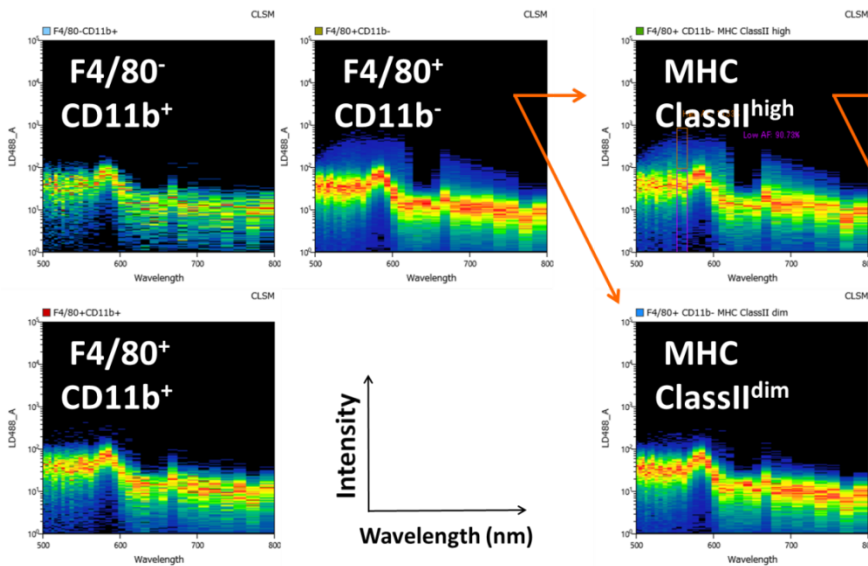**b**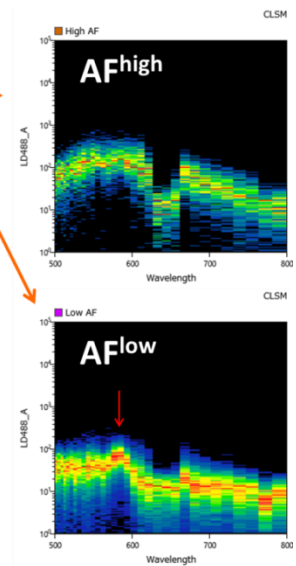

**Supplementary Figure 3. Spectrum derived from cellular autofluorescence.** Splenocytes from wild type mice were stained with APC-conjugated anti-F4/80 mAb, Alexa Fluor® 700-conjugated anti-MHC Class II mAb, and APC-Cy7-conjugated anti-CD11b mAb and analyzed by the spectral-FCM. Emission spectra with 488 nm laser excitation are shown. a) Spectrum of F4/80<sup>-</sup>CD11b<sup>+</sup>, F4/80<sup>+</sup>CD11b<sup>+</sup>, F4/80<sup>+</sup>CD11b<sup>-</sup>, F4/80<sup>+</sup>CD11b<sup>-</sup>Class II<sup>high</sup> and F4/80<sup>+</sup>CD11b<sup>-</sup>Class II<sup>dim</sup> are shown. Broad curve spectrum derived high cellular autofluorescence was observed in F4/80<sup>+</sup>CD11b<sup>-</sup>MHC Class II<sup>high</sup> population. b) Comparison between high autofluorescence and low autofluorescence. Narrow peak observed around 580 nm (red arrow) is water Raman scatter, not cellular AF. Data are representative of three individual experiments.

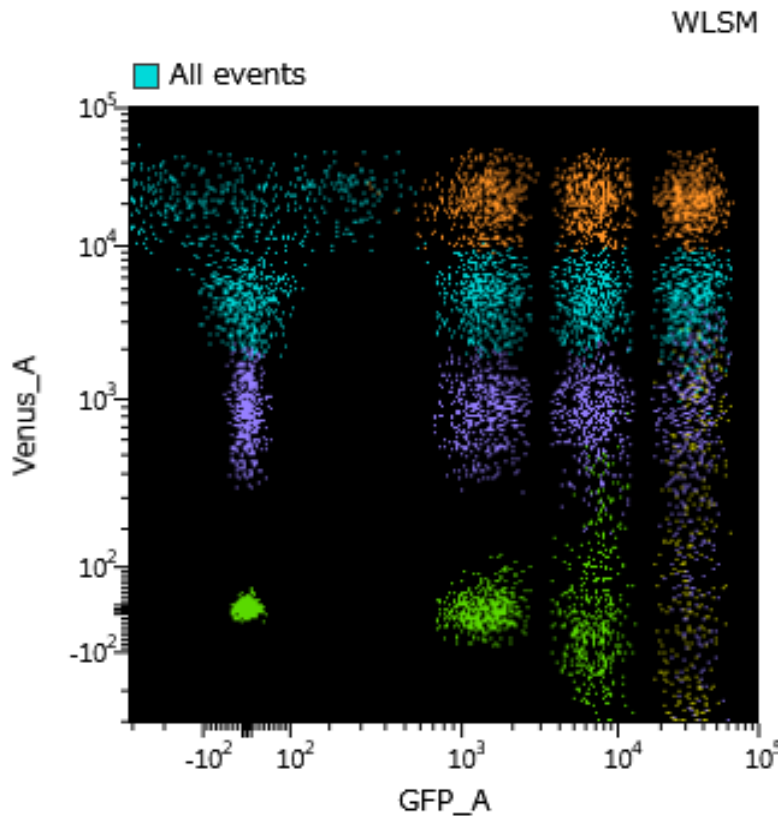

**Supplementary Figure 4. Unmixed data of the simulated data from EGFP and Venus.** Simulated data was generated from synthesizing unstained sample data, EGFP single stain data, and Venus single stain data which were used in **Fig. 4b** with the equation mentioned in **Methods: *In silico* simulation**. There are  $4 \times 4 = 16$  populations in this dot plot. To help identifying each population, some populations are painted with different colors.

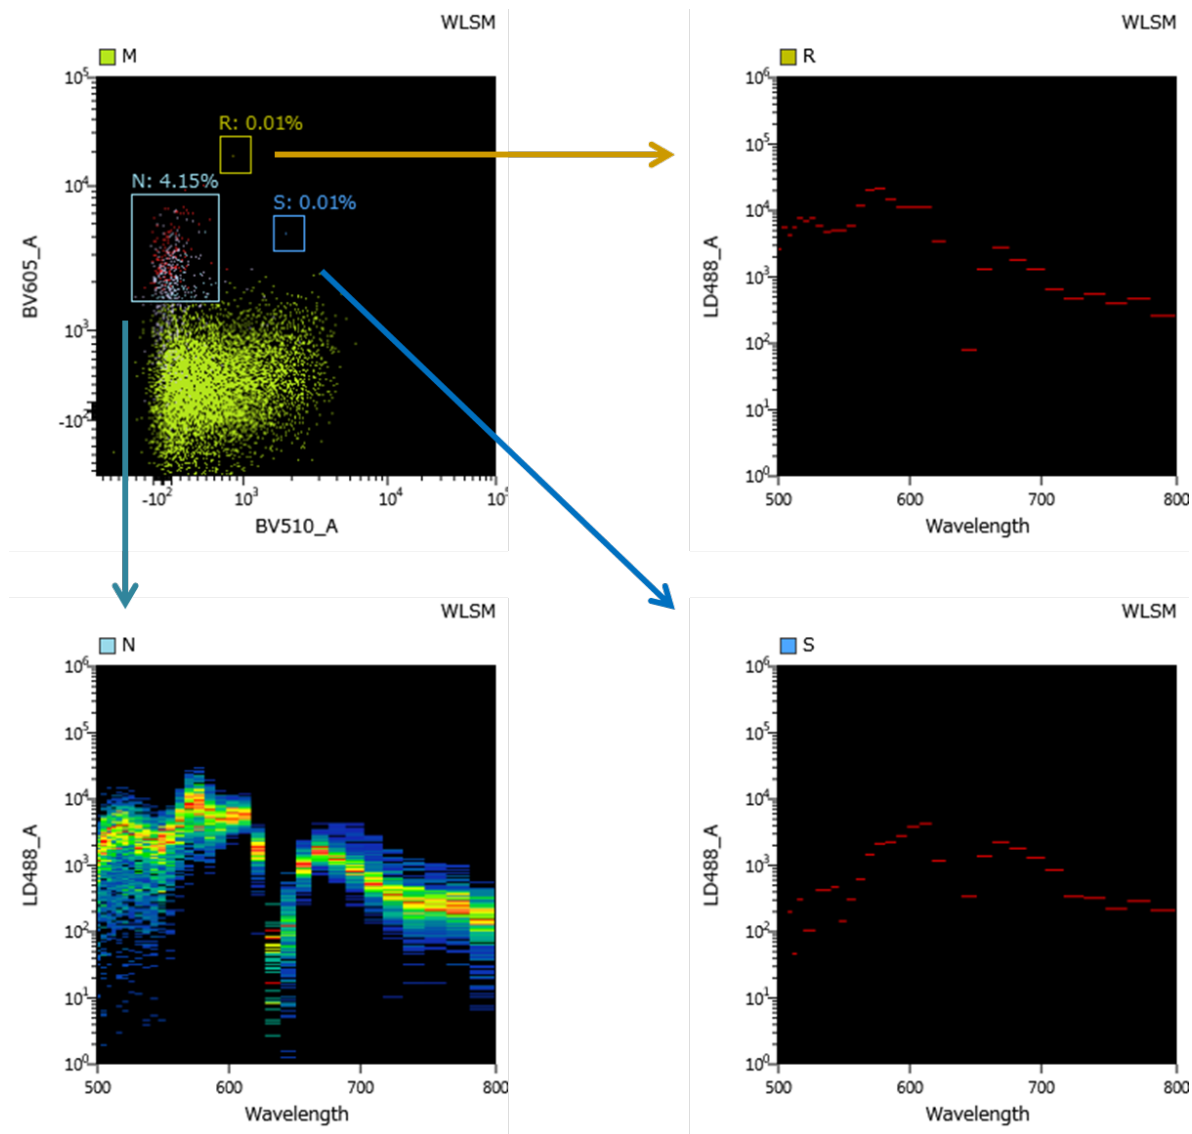

**Supplementary Figure 5. Spectral shapes in different populations.**

Gate N shows merged spectra of certain amount of cells. On the other hand, Gate R and S show only one spectrum observed from one cell, respectively.

**Supplementary Table 2.** Summary of cells and fluorochrome-conjugated antibodies in the experiment of separation of spectrally-adjacent fluorophores

| Combinations                  |        | Fluorescents                               | Cells                                                                                    |
|-------------------------------|--------|--------------------------------------------|------------------------------------------------------------------------------------------|
| EGFP / FITC                   | Single | Langerin-EGFP                              | CD11c <sup>+</sup> lymph node cells of Langerin-EGFP mice <sup>1</sup>                   |
|                               | Single | FITC-anti-CD8 mAb                          | Lymph node cells of wild-type mice                                                       |
|                               | Both   | Langerin-EGFP / FITC-CD45                  | CD11c <sup>+</sup> lymph node cells of Langerin-EGFP mice <sup>1</sup>                   |
| KikGR-Green / Venus           | Single | Venus                                      | CD19 <sup>+</sup> lymph node cells of KikGR/SCAT3.1 mice <sup>3,4</sup>                  |
|                               | Single | KikGR-Green <sup>2</sup>                   | CD19 <sup>+</sup> lymph node cells of KikGR mice <sup>3</sup>                            |
|                               | Both   | Venus / KikGR-Green <sup>2</sup>           | CD19 <sup>+</sup> lymph node cells of KikGR/SCAT3.1 mice <sup>3,4</sup>                  |
| KikGR-Red/PE                  | Single | KikGR-Red <sup>5</sup>                     | Lymph node cells of KikGR mice                                                           |
|                               | Single | PE-anti-CD8 mAb                            | Lymph node cells of wild-type mice                                                       |
|                               | Both   | KikGR-Red / PE                             | Lymph node cells of KikGR mice                                                           |
| EGFP / Venus                  | Single | EGFP                                       | Lymph node cells of EGFP-Tg mice                                                         |
|                               | Single | Venus                                      | Lymph node cells of SCAT3.1 mice <sup>4</sup>                                            |
|                               | Both   | EGFP / Venus                               | Lymph node cells of EGFP-Tg mice<br>Lymph node cells of SCAT3.1 mice <sup>4</sup>        |
| mAzami-Green / KikGR-Green    | Single | mAzamiGreen                                | Lymph node cells of FucciS/G <sub>2</sub> /M-#474 mice                                   |
|                               | Single | KikGR-Green <sup>2</sup>                   | Lymph node cells of KikGR mice                                                           |
|                               | Both   | mAzami-Green / KikGR-Green                 | Lymph node cells of FucciS/G <sub>2</sub> /M-#474 mice<br>Lymph node cells of KikGR mice |
| mKusabira-Orange2 / KikGR-Red | Single | mKusabira-Orange2                          | Lymph node cells of FucciG <sub>1</sub> -#639 mice                                       |
|                               | Single | KikGR-Red <sup>5</sup>                     | Lymph node cells of KikGR mice                                                           |
|                               | Both   | mKusabira-Orange2 / KikGR-Red <sup>4</sup> | Lymph node cells of FucciG <sub>1</sub> -#639 mice<br>Lymph node cells of KikGR mice     |
| Autofluorescence high / low   | Single | Autofluorescence low                       | Spleen cells of wild-type mice                                                           |
|                               | Single | Autofluorescence high                      | Spleen cells of wild-type mice                                                           |
|                               | Both   | Autofluorescence high / low                | Spleen cells of wild-type mice                                                           |

1. Cells were stained with APC-Cy7-conjugated anti-CD11c monoclonal antibody and gated CD11c<sup>+</sup> cells.
2. KikGR-Green: Cells were used without photoconversion.
3. SCAT3.1 molecule is a fusion protein of ECFP and Venus binding with caspase-3 cleavable peptide. We confirmed fluorescent spectrum excited with 488 nm laser of SCAT3.1 is almost identical to that of Venus (data not shown) and used SCAT3.1 for fluorescent signal source of Venus.
4. Cells were stained with APC-conjugated anti-CD19 monoclonal antibody and gated CD19<sup>+</sup> cells.
5. KikGR-Red : Cells from KikGR mice were irradiated with violet light (436 nm, 100 mW/cm<sup>2</sup>, 960 sec). After irradiation of this condition, green fluorescence disappeared as shown in Fig. 3a,b and photoconversion of KikGR completed.
